# Supplementary material for: PROPER: global protein interaction network alignment through percolation matching
Source: PubMed Central journal article supplement (PMC5153870; doi:10.1186/s12859-016-1395-9), 2016-12-12
Supplement: 12859_2016_1395_MOESM2_ESM.pdf [file 12859_2016_1395_MOESM2_ESM.pdf]

# The PROPER Algorithm: Detailed Comparisons

Ehsan Kazemi, Hamed Hassani, Matthias Grossglauer and Hassan Pezeshgi Modarres

Table 1: The experimental results for PROPER with different values of  $r \in \{1, 2\}$  and  $\ell \in \{150, 200, 300, 400, 500, 600\}$ . The results are the average of 10 pairwise alignments between species from Table 2.

| $r, \ell$ | $ \pi $       | GOC (all)       | GOC (exp.)     | EC           | ICS          | $S^3$        | LCSC          |
|-----------|---------------|-----------------|----------------|--------------|--------------|--------------|---------------|
| 1,150     | <b>5521.2</b> | <b>1388.562</b> | <b>371.460</b> | 0.231        | 0.218        | 0.102        | 3345.7        |
| 1,200     | 5471.4        | 1284.853        | 351.285        | 0.249        | 0.235        | 0.112        | 3610.7        |
| 1,300     | 5432.9        | 1117.425        | 321.699        | 0.273        | 0.264        | 0.125        | 4081.9        |
| 1,400     | 5416.4        | 999.517         | 301.476        | 0.292        | 0.279        | 0.135        | 4397.3        |
| 1,500     | 5347.4        | 913.508         | 285.664        | 0.303        | 0.285        | 0.140        | 4533.4        |
| 1,600     | 5320.5        | 832.233         | 271.684        | <b>0.309</b> | <b>0.295</b> | <b>0.145</b> | <b>4669.8</b> |
| 2,150     | 3116.1        | 1224.103        | 299.481        | 0.114        | 0.185        | 0.060        | 1375.7        |
| 2,200     | 2900.3        | 1104.756        | 275.392        | 0.122        | 0.205        | 0.066        | 1433.6        |
| 2,300     | 2618.4        | 920.392         | 239.140        | 0.134        | 0.247        | 0.075        | 1566.2        |
| 2,400     | 2408.7        | 791.523         | 212.464        | 0.143        | 0.269        | 0.082        | 1617.8        |
| 2,500     | 2216.1        | 687.839         | 191.209        | 0.147        | 0.280        | 0.086        | 1602.8        |
| 2,600     | 2094.0        | 603.080         | 173.923        | 0.148        | 0.296        | 0.089        | 1596.8        |

Table 2: PPI networks of five major eukaryotic species from IntAct molecular interaction database [2, 1].

| species                | #nodes | #edges | Avg. deg. | #pathways |
|------------------------|--------|--------|-----------|-----------|
| <i>C. elegans</i>      | 4950   | 11550  | 4.67      | 117       |
| <i>D. melanogaster</i> | 8532   | 26289  | 6.16      | 127       |
| <i>H. sapiens</i>      | 19141  | 83312  | 8.71      | 288       |
| <i>M. musculus</i>     | 10765  | 22345  | 4.15      | 284       |
| <i>S. cerevisiae</i>   | 6283   | 76497  | 24.35     | 98        |

Figure 1 and 2 compare algorithms based on precision over synthetic networks.

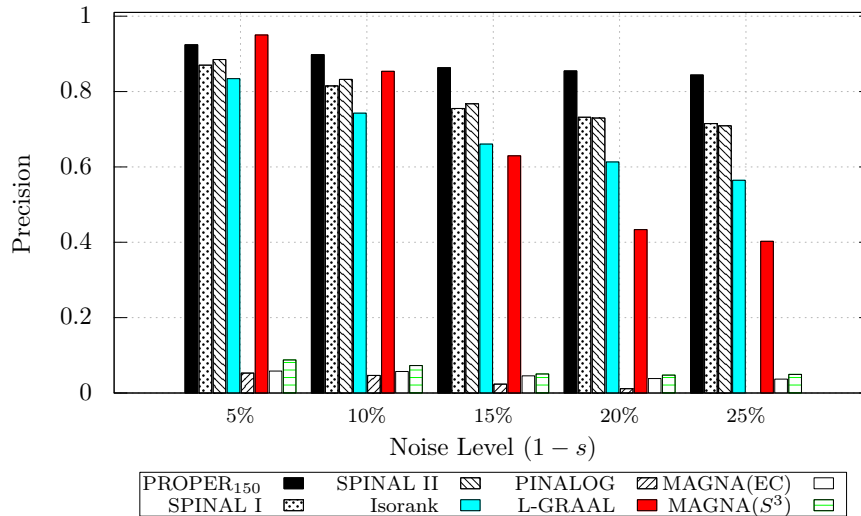

Figure 1: Comparison of different global network-aligners over synthetic networks based on precision. The sequence similarity for 50% of randomly chosen proteins is provided. For the PROPER algorithm, we set  $r = 1$  and  $\ell = 150$ . The parameter  $\alpha$  is 0.7.

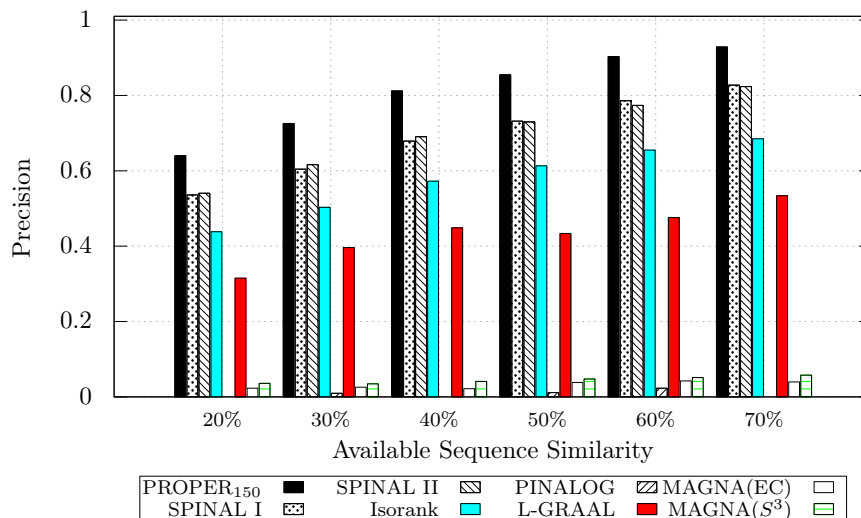

Figure 2: Comparison of different global network-aligners over synthetic networks based on precision. The level of noise is set to  $1 - s = 20\%$ . For the PROPER algorithm, we set  $r = 1$  and  $\ell = 150$ . The parameter  $\alpha$  is 0.7.

## References

- [1] IntAct: an open source molecular interaction database. <http://www.ebi.ac.uk/intact/>. Data acquired on 04 April 2016.
- [2] H. Hermjakob, L. Montecchi-Palazzi, C. Lewington, S. Mudali, S. Kerrien, S. Orchard, M. Vingron, B. Roechert, P. Roepstorff, A. Valencia, et al. IntAct: an open source molecular interaction database. *Nucleic acids research*, 32(suppl 1):D452–D455, 2004.
