# Supplementary material for: PROPER: global protein interaction network alignment through percolation matching
Source: PubMed Central journal article supplement (PMC5153870; doi:10.1186/s12859-016-1395-9), 2016-12-12
Supplement: 12859_2016_1395_MOESM3_ESM.pdf [file 12859_2016_1395_MOESM3_ESM.pdf]

# Pathways: Experimental Results

Ehsan Kazemi, Hamed Hassani, Matthias Grossglauser and Hassan Pezeshgi Modarres

In this appendix, we provide the results of our experiments for aligning biological pathways in more details. The results for each one of the algorithms are reported in Tables 1, 2, 3, 4, 5 and 6.

Table 1: The PROPER algorithm: pathways with at least four conserved edges ( $\delta = 4$ ) in the intersection graph  $G_0$ .

| species | #PW $_{\delta}$ | #FPW $_{\delta}$ | $\overline{acc}_{\pi,\delta}$ | $recall_{\pi}$ |
|---------|-----------------|------------------|-------------------------------|----------------|
| ce-hs   | 19              | 8                | 0.455                         | 0.421          |
| dm-hs   | 31              | 12               | 0.611                         | 0.387          |
| hs-mm   | 152             | 128              | 0.788                         | 0.842          |
| sc-hs   | 32              | 22               | 0.486                         | 0.688          |
| Average | 58.5            | 42.5             | 0.585                         | 0.584          |

Table 2: SPINAL I algorithm: pathways with at least four conserved edges ( $\delta = 4$ ) in the intersection graph  $G_0$ .

| species | #PW $_{\delta}$ | #FPW $_{\delta}$ | $\overline{acc}_{\pi,\delta}$ | $recall_{\pi}$ |
|---------|-----------------|------------------|-------------------------------|----------------|
| ce-hs   | 19              | 7                | 0.472                         | 0.368          |
| dm-hs   | 31              | 11               | 0.564                         | 0.355          |
| hs-mm   | 152             | 116              | 0.711                         | 0.763          |
| sc-hs   | 32              | 21               | 0.469                         | 0.656          |
| Average | 58.5            | 38.75            | 0.554                         | 0.536          |

Table 3: SPINAL II algorithm: pathways with at least four conserved edges ( $\delta = 4$ ) in the intersection graph  $G_0$ .

| species | #PW $_{\delta}$ | #FPW $_{\delta}$ | $\overline{acc}_{\pi,\delta}$ | $recall_{\pi}$ |
|---------|-----------------|------------------|-------------------------------|----------------|
| ce-hs   | 19              | 1                | 0.301                         | 0.053          |
| dm-hs   | 31              | 1                | 0.081                         | 0.032          |
| hs-mm   | 152             | 30               | 0.261                         | 0.197          |
| sc-hs   | 32              | 4                | 0.247                         | 0.125          |
| Average | 58.5            | 9                | 0.223                         | 0.102          |

Table 4: PINALOG algorithm: pathways with at least four conserved edges ( $\delta = 4$ ) in the intersection graph  $G_0$ .

| species | #PW $_{\delta}$ | #FPW $_{\delta}$ | $\overline{acc}_{\pi,\delta}$ | $recall_{\pi}$ |
|---------|-----------------|------------------|-------------------------------|----------------|
| ce-hs   | 19              | 8                | 0.409                         | 0.421          |
| dm-hs   | 31              | 9                | 0.459                         | 0.290          |
| hs-mm   | 152             | 120              | 0.629                         | 0.789          |
| sc-hs   | 32              | 22               | 0.492                         | 0.687          |
| Average | 58.5            | 39.75            | 0.497                         | 0.547          |

Table 5: L-GRAAL algorithm: pathways with at least four conserved edges ( $\delta = 4$ ) in the intersection graph  $G_0$ .

| species | #PW $_{\delta}$ | #FPW $_{\delta}$ | $\overline{acc}_{\pi,\delta}$ | $recall_{\pi}$ |
|---------|-----------------|------------------|-------------------------------|----------------|
| ce-hs   | 19              | 1                | 0.211                         | 0.053          |
| dm-hs   | 31              | 1                | 0.312                         | 0.032          |
| hs-mm   | 152             | 92               | 0.414                         | 0.605          |
| sc-hs   | 32              | 8                | 0.344                         | 0.250          |
| Average | 58.5            | 25.5             | 0.320                         | 0.235          |

Table 6: IsoRank algorithm: pathways with at least four edges conserved ( $\delta = 4$ ) in the intersection graph  $G_0$ .

| species | #PW $_{\delta}$ | #FPW $_{\delta}$ | $\overline{acc}_{\pi,\delta}$ | $recall_{\pi}$ |
|---------|-----------------|------------------|-------------------------------|----------------|
| ce-hs   | 19              | 3                | 0.341                         | 0.158          |
| dm-hs   | 31              | 5                | 0.442                         | 0.161          |
| hs-mm   | 152             | 60               | 0.407                         | 0.395          |
| sc-hs   | 32              | 6                | 0.234                         | 0.186          |
| Average | 58.5            | 18.5             | 0.356                         | 0.225          |

The pathways hsa05200 and mmu05200 are the pathways in the class cancer Homo sapiens (human). The largest connected subgraphs of hsa05200 and mmu05200 pathways in the intersection graph  $G_0$  from all the algorithms are shown in Figures 1, 2, 3, 4, 5 and 6.

Next, we consider another pathway. The largest connected subgraphs of hsa04510 and mmu04510 pathways in the intersection graph  $G_0$  from all the algorithms are shown in Figures 7, 8, 9, 10, 11 and 12. We observe that, again, PROPER returns alignments with a larger portion of connected conserved subgraphs compared to other algorithms.

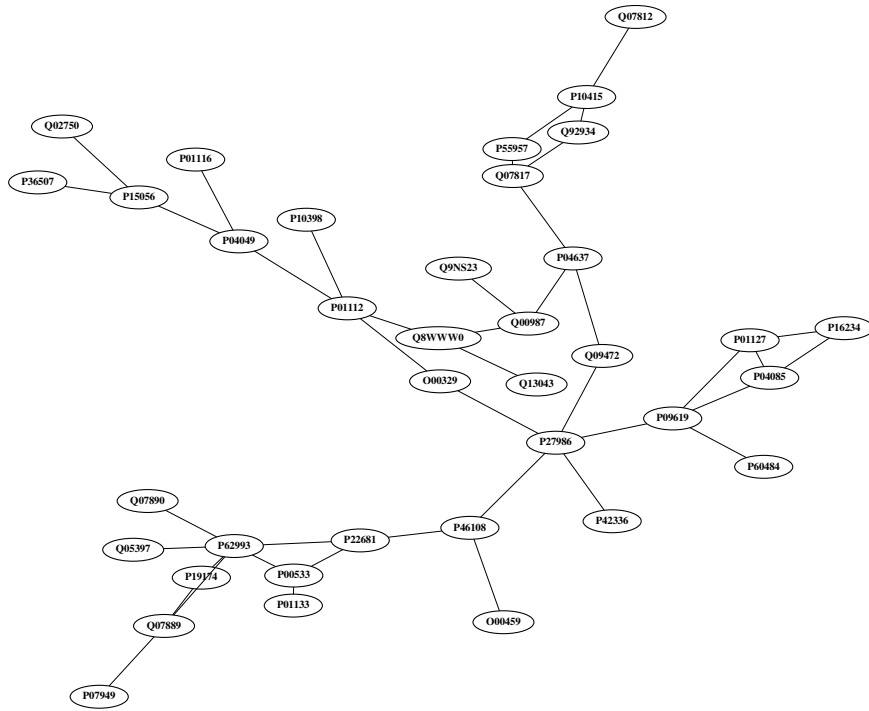

Figure 1: PROPER: pathways hsa05200 and mmu05200. Subgraph is preserved in hs and mm. This connected subgraph of the pathway has 37 nodes and 42 edges.

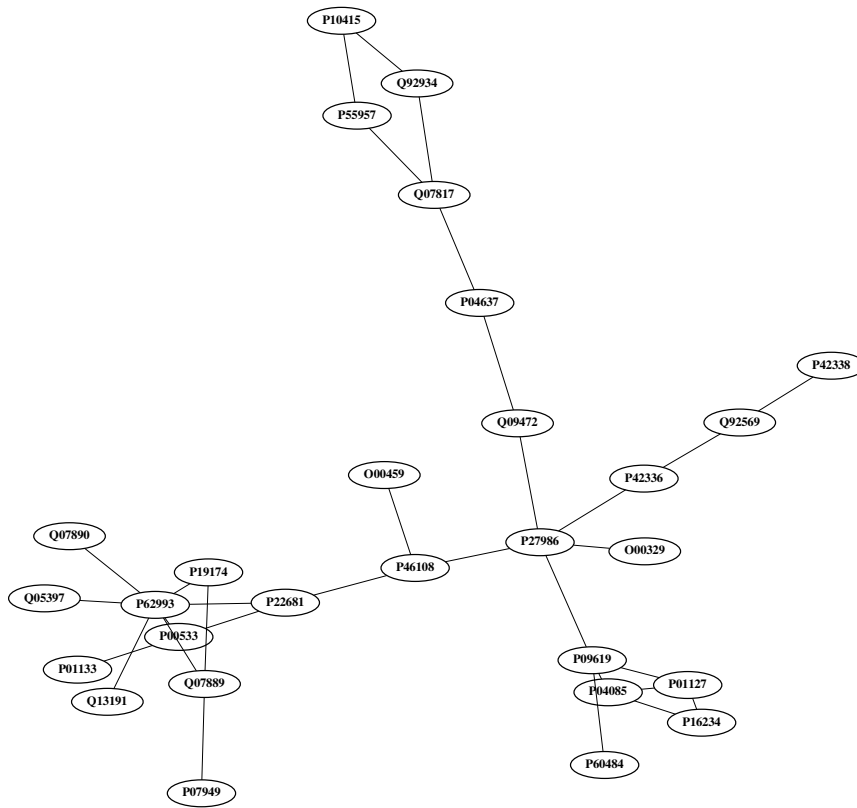

Figure 2: PINALOG: pathways hsa05200 and mmu05200. Subgraph is preserved in hs and mm. This connected subgraph of the pathway has 28 nodes and 32 edges.

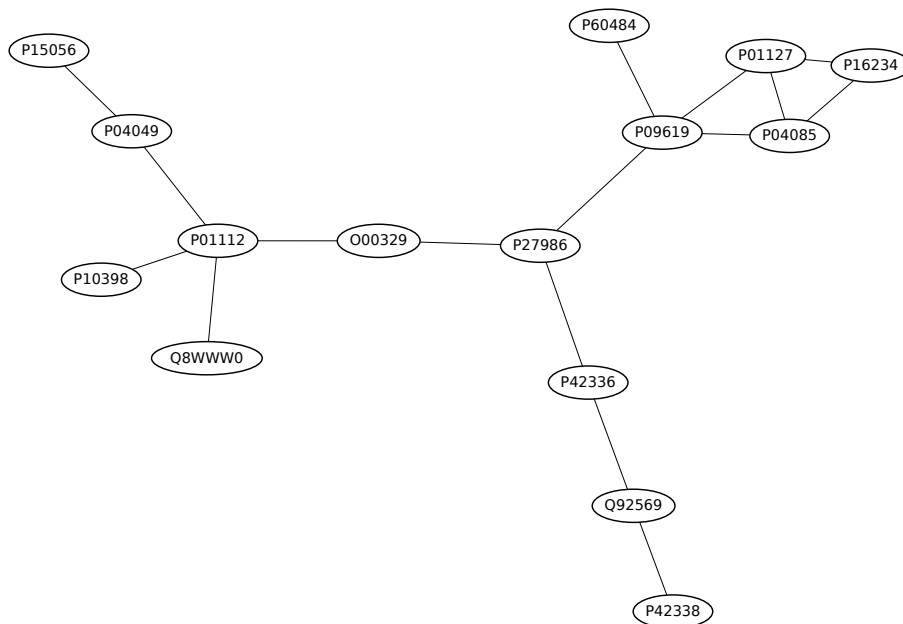

Figure 3: L-GRAAL: pathways hsa05200 and mmu05200. Subgraph is preserved in hs and mm. This connected subgraph of the pathway has 15 nodes and 16 edges.

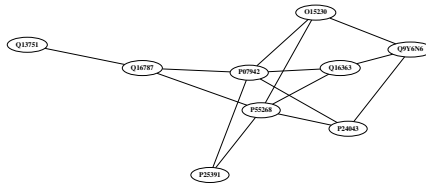

Figure 4: SPINAL I: pathways hsa05200 and mmu05200. Subgraph is preserved in hs and mm. This connected subgraph of the pathway has 9 nodes and 14 edges.

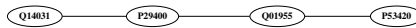

Figure 5: SPINAL II: pathways hsa05200 and mmu05200. Subgraph is preserved in hs and mm. This connected subgraph of the pathway has 4 nodes and 3 edges.

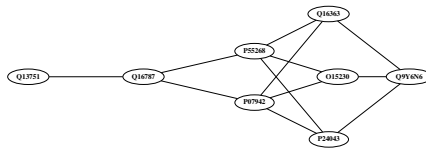

Figure 6: IsoRank: pathways hsa05200 and mmu05200. Subgraph is preserved in hs and mm. This connected subgraph of the pathway has 8 nodes and 12 edges.

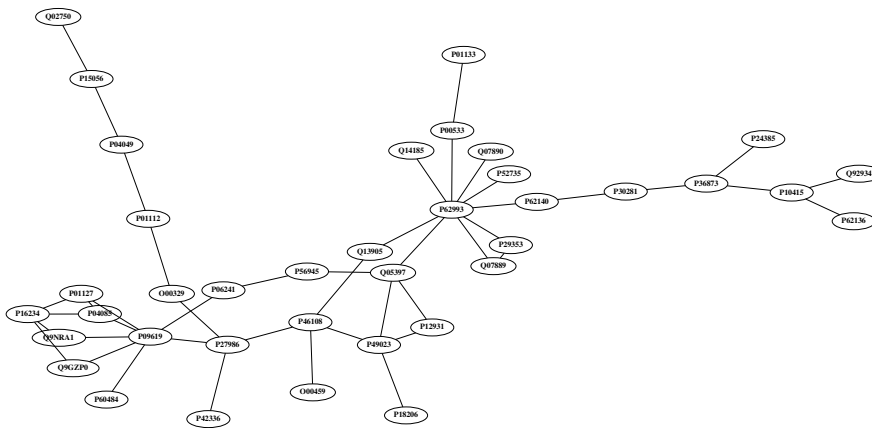

Figure 7: PROPER: pathways hsa04510 and mmu04510. Subgraph is preserved in hs and mm. This connected subgraph of the pathway has 38 nodes and 45 edges.

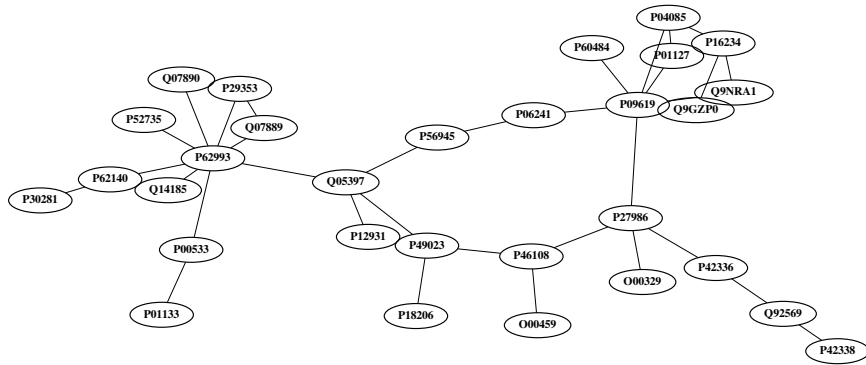

Figure 8: PINALOG: pathways hsa04510 and mmu04510. Subgraph is preserved in hs and mm. This connected subgraph of the pathway has 30 nodes and 36 edges.

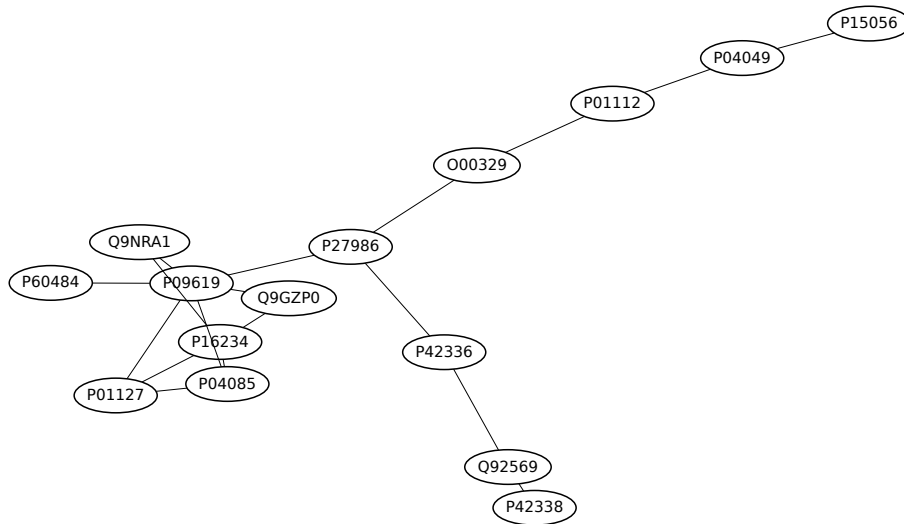

Figure 9: L-GRAAL: pathways hsa04510 and mmu04510. Subgraph is preserved in hs and mm. This connected subgraph of the pathway has 15 nodes and 18 edges.

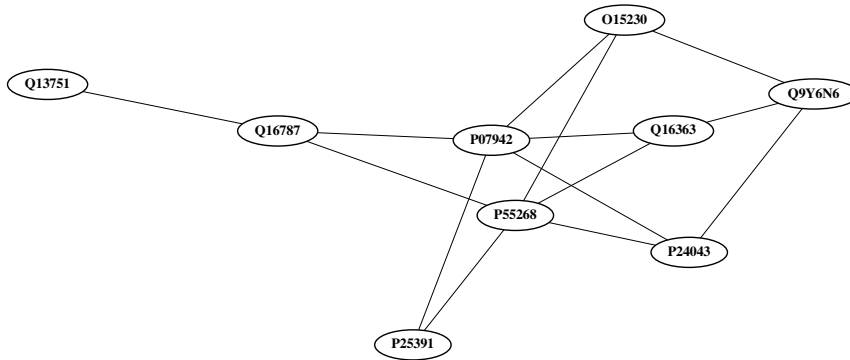

Figure 10: SPINAL I: pathways hsa04510 and mmu04510. Subgraph is preserved in hs and mm. This connected subgraph of the pathway has 9 nodes and 14 edges.

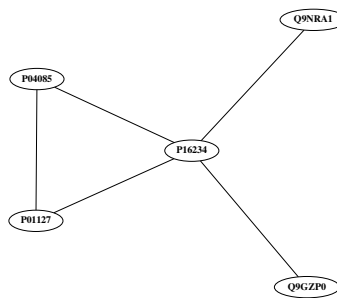

Figure 11: SPINAL II: pathways hsa04510 and mmu04510. Subgraph is preserved in hs and mm. This connected subgraph of the pathway has 5 nodes and 5 edges.

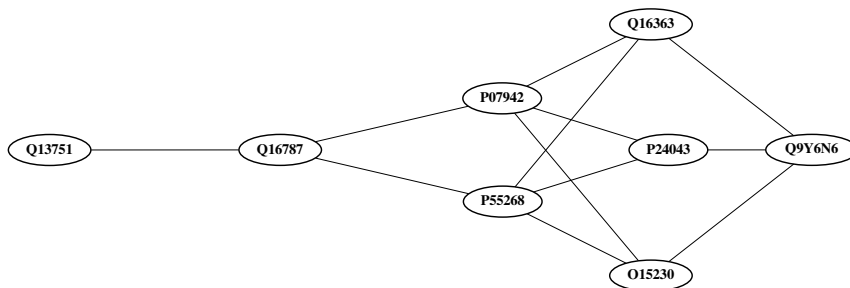

Figure 12: IsoRank: pathways hsa04510 and mmu04510. Subgraph is preserved in hs and mm. This connected subgraph of the pathway has 8 nodes and 12 edges.
